# Supplementary material for: The contribution of asymptomatic SARS-CoV-2 infections to transmission on the Diamond Princess cruise ship
Source: eLife. 2020 Aug 24;9:e58699. doi: 10.7554/eLife.58699 (PMC7527238; doi:10.7554/eLife.58699)
Supplement: Figure 1—source data 1. — Median and equal-tailed 95% marginal posterior parameter values estimated using 100,000 samples from the joint posterior distribution found during MCMC model calibration. See Table 2 for parameter definitions and descriptions. [file elife-58699-fig1-data1.xlsx]

## Sheet: Sheet2
Parameter	0.025	0.5	0.975
beta_bar	1.34	2.2	5
c_pp	0.97	1.29	1.74
b_1	0.96	0.99	1
tau_cc	20.2	21.8	23.9
tau_pp, tau_pc	15.2	16.1	16.9
chi	0.7	0.74	0.78
theta_a	0.07	0.56	0.98
theta_p	0.03	0.5	0.97
